# Supplementary material for: Self-assembly of cellulose nanocrystals confined to square capillaries
Source: Royal Society of Chemistry journal article supplement (doi:10.1039/d3nr02650g), 2023-01-01
Supplement: d3nr02650g1.pdf [file d3nr02650g1.pdf]

Supplementary material for

**Self-assembly of cellulose nanocrystals confined to square capillaries**

Amanda J. Ackroyd, Adam De Paolis, Yi-Tao Xu, Arash Momeni, Wadood Y. Hamad, Mark J. MacLachlan \*

\*Corresponding author. Email: mmaclach@chem.ubc.ca

**Table of Contents**

|                                                                                        |        |
|----------------------------------------------------------------------------------------|--------|
| <b>Fig. S1.</b> TEM image and measurements of the CNCs .....                           | p. S2. |
| <b>Table S1.</b> TEM measurements for the lengths and widths of CNCs .....             | p. S2. |
| <b>Fig. S2.</b> 3D printed holder for the CNCs confined to capillaries .....           | p. S2. |
| <b>Fig. S3.</b> $P/2$ measurements using POM .....                                     | p. S3. |
| <b>Table S2.</b> Measurement of the $ChN$ CNC $P/2$ .....                              | p. S3. |
| <b>Table S3.</b> Measurement of the central dark region width and R .....              | p. S4. |
| <b>Fig. S4.</b> Artifacts observed in CLSM .....                                       | p. S4. |
| <b>Fig. S5.</b> Distortions in CLSM with larger capillaries .....                      | p. S5. |
| <b>Fig. S6.</b> Measurements from CLSM .....                                           | p. S5. |
| <b>Table S4.</b> Measurement of CNC $P/2$ from CLSM .....                              | p. S6. |
| <b>Table S5.</b> Measurement of $ChN$ CNC cylindrical core structures from CLSM .....  | p. S6. |
| <b>Fig. S7.</b> POM images of square capillaries after 15 min .....                    | p. S7. |
| <b>Fig. S8.</b> POM images of square capillaries after 72 h .....                      | p. S7. |
| <b>Fig. S9.</b> POM images of cylindrical capillaries after 72 h .....                 | p. S8. |
| <b>Fig. S10.</b> CLSM images of cylindrical capillaries .....                          | p. S8. |
| <b>Fig. S11.</b> Gelation structures of silica/CNC aerogels captured using SEM .....   | p. S9. |
| <b>Fig. S12.</b> Attempt to capture CNC structures with SEM using polymerization ..... | p. S9. |

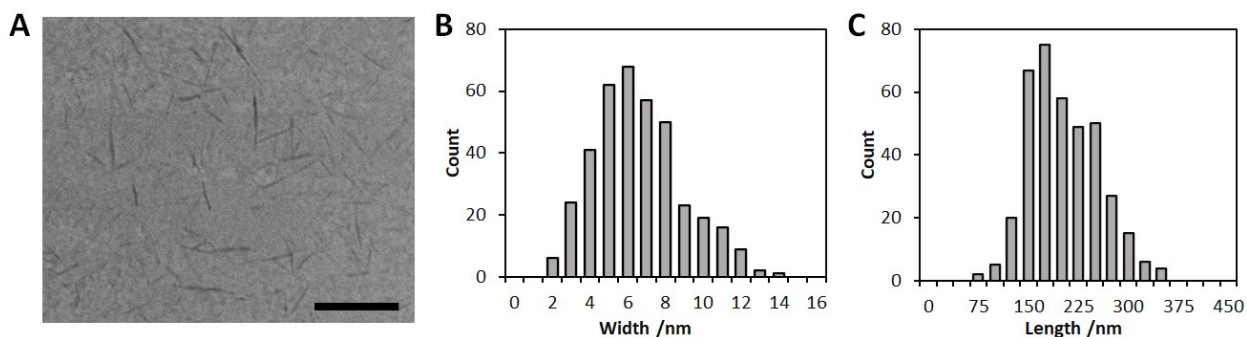

**Fig. S1.** TEM image and measurements of the CNCs. **(A)** Transmission electron microscopy (TEM) image of CNCs (scale bar, 500 nm). Distribution of CNC widths **(B)** and lengths **(C)** for  $N = 379$  nanoparticles.

**Table S1.** TEM measurements for the lengths and widths of CNCs from final *ChN* suspensions;  $N$ ,  $\bar{x}$ , SD, SE, and CI refer to the number of measurements, average, standard deviation, standard error, and confidence interval to 95%

|               | $N$ | $\bar{x}$ ( $\mu\text{m}$ ) | SD ( $\mu\text{m}$ ) | SE ( $\mu\text{m}$ ) | CI ( $\mu\text{m}$ ) |
|---------------|-----|-----------------------------|----------------------|----------------------|----------------------|
| <b>Length</b> | 379 | 191.0                       | 51.8                 | 2.66                 | 5.21                 |
| <b>Width</b>  | 379 | 6.13                        | 2.71                 | 0.14                 | 0.27                 |

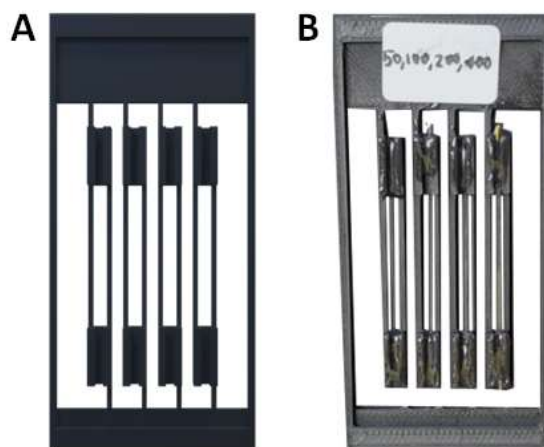

**Fig. S2.** 3D printed holder for the CNCs confined to capillaries. **(A)** 3D model of the holder and **(B)** 3D-printed holder with capillary tubes fixed. To image by POM, the thin connectors were cut to allow for 90° rotation on a glass slide.

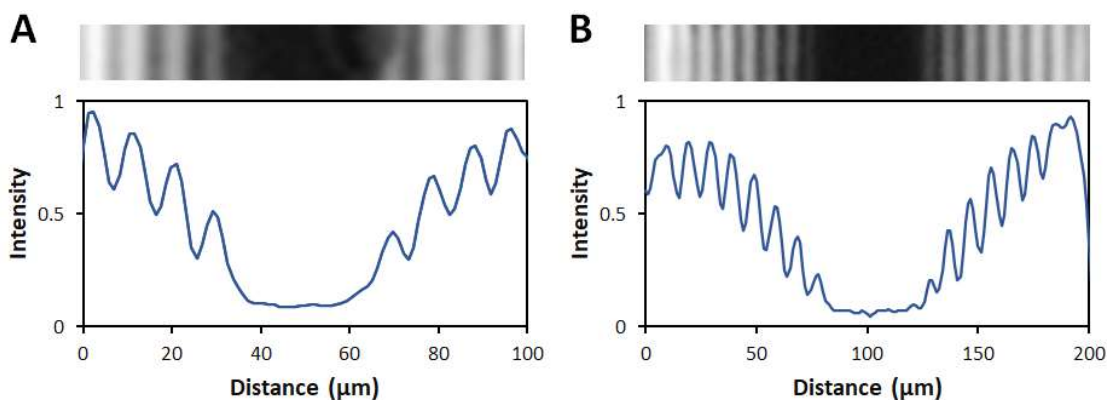

**Fig. S3.** Method used to measure the *ChN* pitch and central dark bands of the capillaries. POM images and their corresponding intensity profiles for the (A) 100  $\mu\text{m}$  and (B) 200  $\mu\text{m}$  capillaries after 24 h.

**Table S2.** Measurement of the *ChN* CNC  $P/2$  formed within the capillaries after 24 h and 72 h;  $N$ ,  $\bar{x}$ , SD, SE, and CI refer to the number of measurements, average, standard deviation, standard error, and confidence interval to 95%

| 24 h      |     |                             |                      |                      |                      |
|-----------|-----|-----------------------------|----------------------|----------------------|----------------------|
| Capillary | $N$ | $\bar{x}$ ( $\mu\text{m}$ ) | SD ( $\mu\text{m}$ ) | SE ( $\mu\text{m}$ ) | CI ( $\mu\text{m}$ ) |
| 50        | 30  | 10.30                       | 2.80                 | 0.51                 | 1.00                 |
| 100       | 37  | 9.10                        | 0.06                 | 0.01                 | 0.02                 |
| 200       | 47  | 8.90                        | 1.00                 | 0.15                 | 0.29                 |
| 400       | 60  | 9.30                        | 0.70                 | 0.09                 | 0.18                 |
| 72 h      |     |                             |                      |                      |                      |
| Capillary | $N$ | $\bar{x}$ ( $\mu\text{m}$ ) | SD ( $\mu\text{m}$ ) | SE ( $\mu\text{m}$ ) | CI ( $\mu\text{m}$ ) |
| 50        | 37  | 8.95                        | 1.49                 | 0.24                 | 0.49                 |
| 100       | 37  | 8.90                        | 1.00                 | 0.16                 | 0.33                 |
| 200       | 47  | 9.54                        | 1.20                 | 0.17                 | 0.35                 |
| 400       | 60  | 8.95                        | 1.27                 | 0.16                 | 0.33                 |

**Table S3.** Measurement of the central dark region width and  $R$  formed within the capillaries after 24 h and 72 h;  $N$ ,  $\bar{x}$ ,  $SD$ ,  $SE$ , and  $CI$  refer to the number of measurements, average, standard deviation, standard error, and confidence interval to 95%

| 24 h      |     |                             |                        |                        |                        |                             |                        |                        |                        |
|-----------|-----|-----------------------------|------------------------|------------------------|------------------------|-----------------------------|------------------------|------------------------|------------------------|
| Capillary | $N$ | Width                       |                        |                        |                        | $R$                         |                        |                        |                        |
|           |     | $\bar{x}$ ( $\mu\text{m}$ ) | $SD$ ( $\mu\text{m}$ ) | $SE$ ( $\mu\text{m}$ ) | $CI$ ( $\mu\text{m}$ ) | $\bar{x}$ ( $\mu\text{m}$ ) | $SD$ ( $\mu\text{m}$ ) | $SE$ ( $\mu\text{m}$ ) | $CI$ ( $\mu\text{m}$ ) |
| 50        | 18  | 26.31                       | 6.62                   | 1.56                   | 3.12                   | 0.53                        | 0.13                   | 0.01                   | 0.02                   |
| 100       | 17  | 28.94                       | 5.13                   | 1.24                   | 2.49                   | 0.29                        | 0.05                   | 0.01                   | 0.02                   |
| 200       | 18  | 42.15                       | 7.63                   | 1.80                   | 3.60                   | 0.21                        | 0.04                   | 0.01                   | 0.02                   |
| 400       | 14  | 128.00                      | 23.84                  | 6.37                   | 12.74                  | 0.32                        | 0.06                   | 0.02                   | 0.03                   |
| 72 h      |     |                             |                        |                        |                        |                             |                        |                        |                        |
| Capillary | $N$ | Width                       |                        |                        |                        | $R$                         |                        |                        |                        |
|           |     | $\bar{x}$ ( $\mu\text{m}$ ) | $SD$ ( $\mu\text{m}$ ) | $SE$ ( $\mu\text{m}$ ) | $CI$ ( $\mu\text{m}$ ) | $\bar{x}$ ( $\mu\text{m}$ ) | $SD$ ( $\mu\text{m}$ ) | $SE$ ( $\mu\text{m}$ ) | $CI$ ( $\mu\text{m}$ ) |
| 50        | 14  | 19.99                       | 1.53                   | 0.41                   | 0.82                   | 0.40                        | 0.03                   | 0.01                   | 0.02                   |
| 100       | 16  | 28.37                       | 5.70                   | 1.43                   | 2.85                   | 0.28                        | 0.06                   | 0.01                   | 0.03                   |
| 200       | 15  | 45.67                       | 4.68                   | 1.21                   | 2.42                   | 0.23                        | 0.02                   | 0.01                   | 0.01                   |
| 400       | 11  | 115.79                      | 18.18                  | 5.48                   | 10.96                  | 0.29                        | 0.05                   | 0.01                   | 0.03                   |

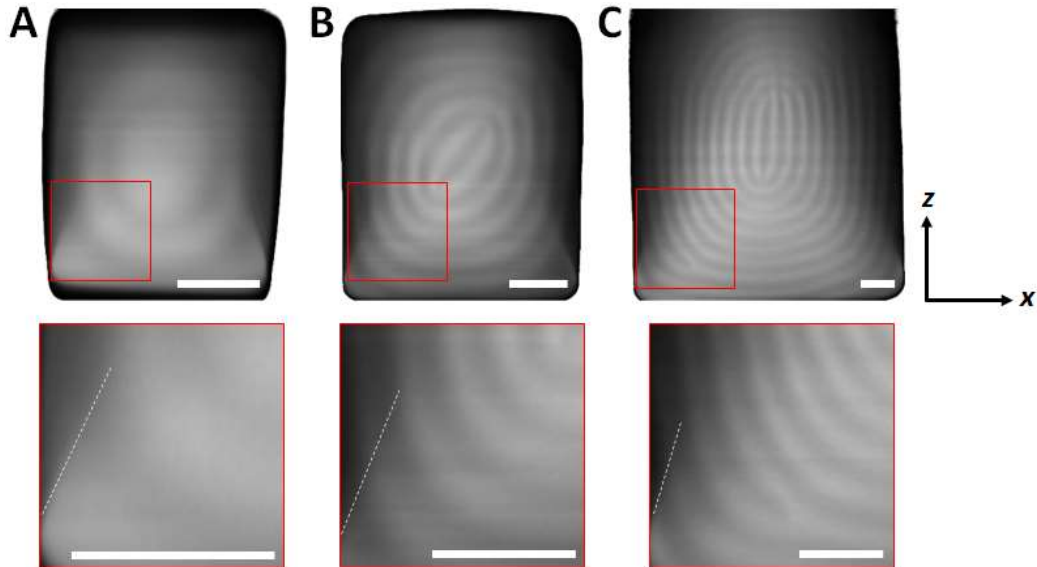

**Fig. S4.** Artifacts in the confocal laser scanning microscopy (CLSM) characterization. **A** to **C** correspond to the 50, 100 and 200  $\mu\text{m}$  width capillaries, respectively. Areas inside the red boxes are expanded beneath to show the darkened regions at the corners, which persist up the walls of the capillary. Scale bars, 25  $\mu\text{m}$ .

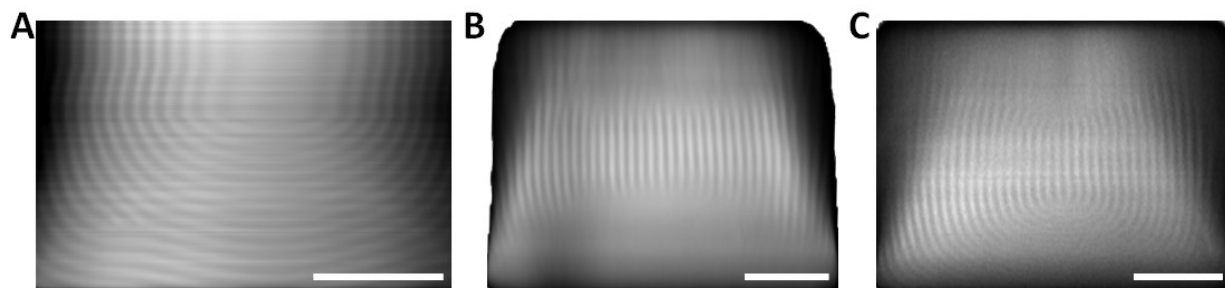

**Fig. S5.** Distortions in CLSM caused by objective working distance and Z-stack interval limitations. Images refer to 40 $\times$ , 10 $\times$ , and 20 $\times$  objectives, respectively (A to C). The 400  $\mu\text{m}$  (200  $\mu\text{m}$  wall thickness) capillaries exceed the size limit for CLSM as a characterization technique. Scale bars, 100  $\mu\text{m}$ .

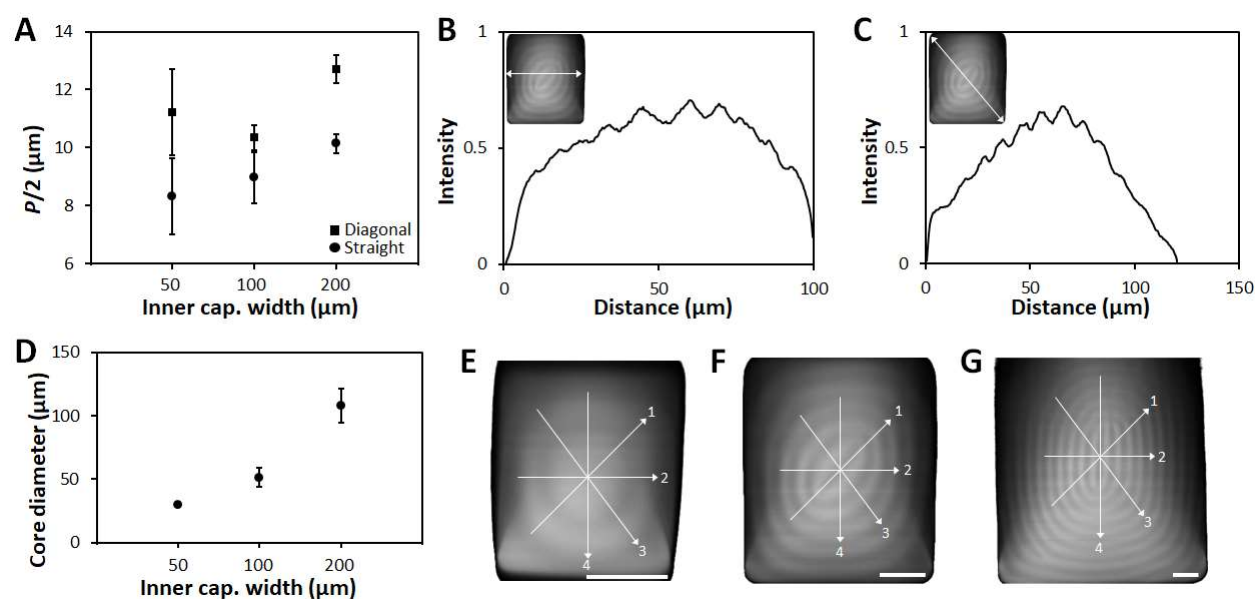

**Fig. S6.** Measurements from CLSM of CNC suspensions doped with 0.0001% rhodamine B dye imaged for the 50, 100 and 200  $\mu\text{m}$  capillaries after 72 h. (A) Average  $P/2$  measurements; square and circle markers correspond to diagonal and planar measurements across the width of the capillary cross-section, respectively. (B) and (C) are intensity profiles of the dye emission intensity across the widths of the capillary from the planar and diagonal measurements, respectively, from images of the 100  $\mu\text{m}$  width capillary. (D) Diameters of the cylindrical structures observed in the cross-section taken by averaging four measurements in the (E) 50, (F) 100, and (G) 200  $\mu\text{m}$  capillaries. Scale bars, 25  $\mu\text{m}$ .

**Table S4.** Measurement of  $P/2$  for CNC suspensions doped with 0.0001% rhodamine B dye imaged with CLSM for the 50, 100 and 200  $\mu\text{m}$  capillaries after 72 h; “diagonal” and “planar” measurements refer to corner-to-corner and edge-to-edge measurements across the width of the capillary cross-section, respectively.  $N$ ,  $\bar{x}$ , SD, SE, and CI refer to the number of measurements, average, standard deviation, standard error, and confidence interval to 95%.  $N$  measurements include both peak-to-peak and valley-to-valley measurements.

|                                                        | 50 $\mu\text{m}$ |        | 100 $\mu\text{m}$ |        | 200 $\mu\text{m}$ |        |
|--------------------------------------------------------|------------------|--------|-------------------|--------|-------------------|--------|
|                                                        | Diagonal         | Planar | Diagonal          | Planar | Diagonal          | Planar |
| <b><math>N</math></b>                                  | 16               | 16     | 33                | 33     | 58                | 58     |
| <b><math>\bar{x}</math> (<math>\mu\text{m}</math>)</b> | 11.22            | 8.32   | 10.35             | 8.97   | 12.71             | 10.14  |
| <b>SD (<math>\mu\text{m}</math>)</b>                   | 3.03             | 2.68   | 1.28              | 2.58   | 1.92              | 1.25   |
| <b>SE (<math>\mu\text{m}</math>)</b>                   | 0.76             | 0.67   | 0.22              | 0.45   | 0.25              | 0.16   |
| <b>CI (<math>\mu\text{m}</math>)</b>                   | 1.49             | 1.32   | 0.44              | 0.88   | 0.49              | 0.32   |

**Table S5.** Average diameters of  $ChN$  cylindrical core structures from the CLSM  $xz$  cross-sectional images.  $N$ ,  $\bar{x}$ , SD, SE, and CI refer to the number of measurements, average, standard deviation, standard error, and confidence interval to 95%

| Capillary  | $N$ | $\bar{x}$ ( $\mu\text{m}$ ) | SD ( $\mu\text{m}$ ) | SE ( $\mu\text{m}$ ) | CI ( $\mu\text{m}$ ) |
|------------|-----|-----------------------------|----------------------|----------------------|----------------------|
| <b>50</b>  | 4   | 29.65                       | 1.07                 | 0.53                 | 1.05                 |
| <b>100</b> | 4   | 51.32                       | 7.46                 | 3.73                 | 7.31                 |
| <b>200</b> | 4   | 107.75                      | 16.62                | 6.81                 | 13.35                |

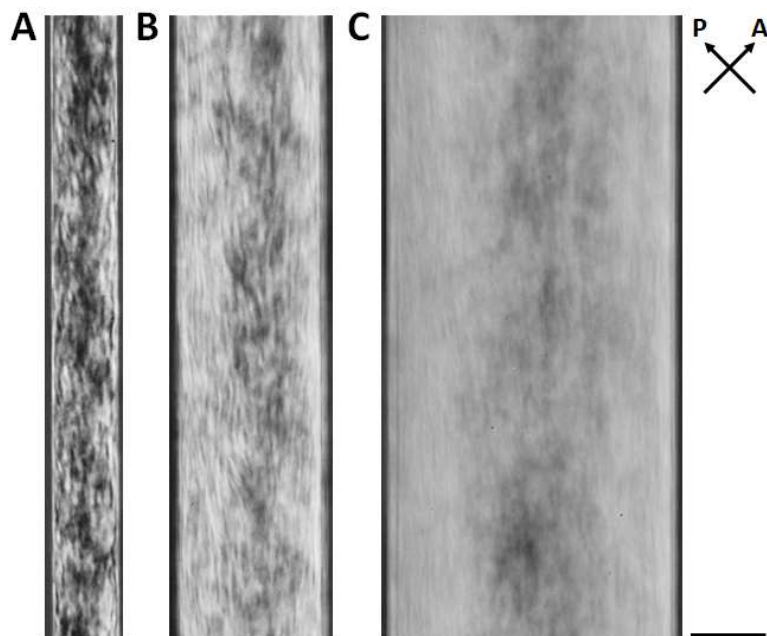

**Fig. S7.** POM images of CNC suspensions inside square capillaries after 15 min equilibration time. (A to C) are capillaries with IDs of 50, 100, 200  $\mu\text{m}$ , respectively, viewed between crossed polarizers. Scale bar, 50  $\mu\text{m}$ .

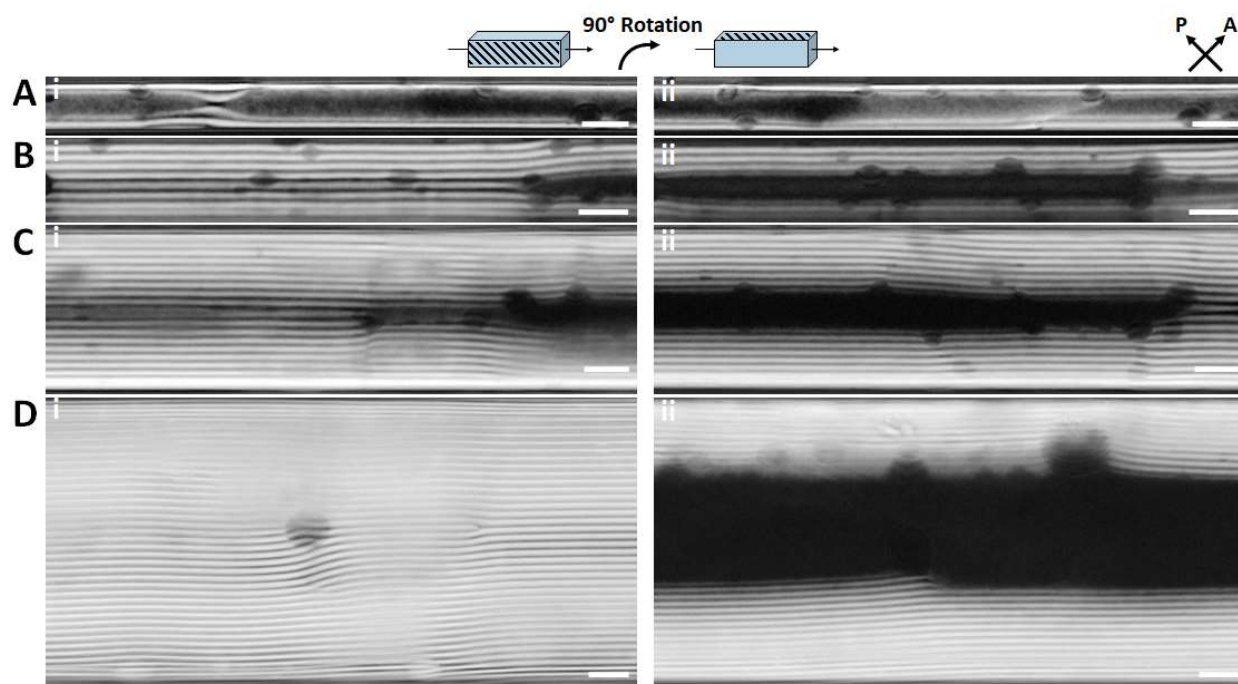

**Fig. S8.** POM images of CNC suspensions inside square capillaries after 72 h equilibration time. (A to D) are capillaries with ID = 50, 100, 200 and 400  $\mu\text{m}$ , respectively, viewed between crossed polarizers. The laying capillaries (i) were rotated 90° with respect to the centre of the capillary (ii). Scale bars, 50  $\mu\text{m}$ .

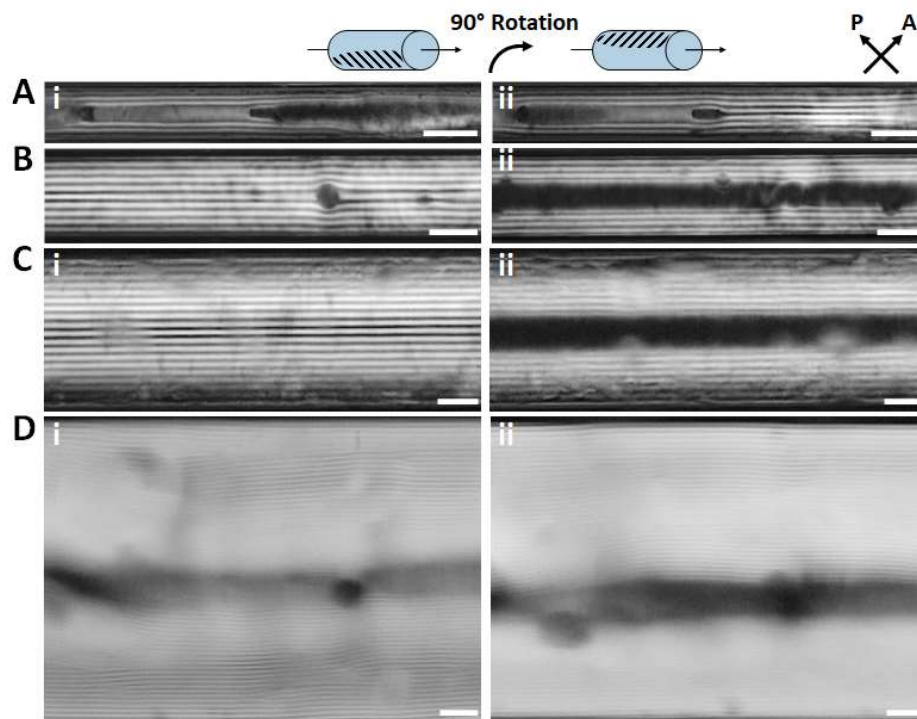

**Fig. S9.** POM images of CNC suspensions inside cylindrical capillaries after 7 d equilibration time. (A to D) are capillaries with ID = 50, 100, 200 and 400, respectively, viewed between crossed polarizers. The horizontal capillaries (i) were rotated 90° with respect to the centre of the capillary (ii). Scale bars, 50  $\mu\text{m}$ .

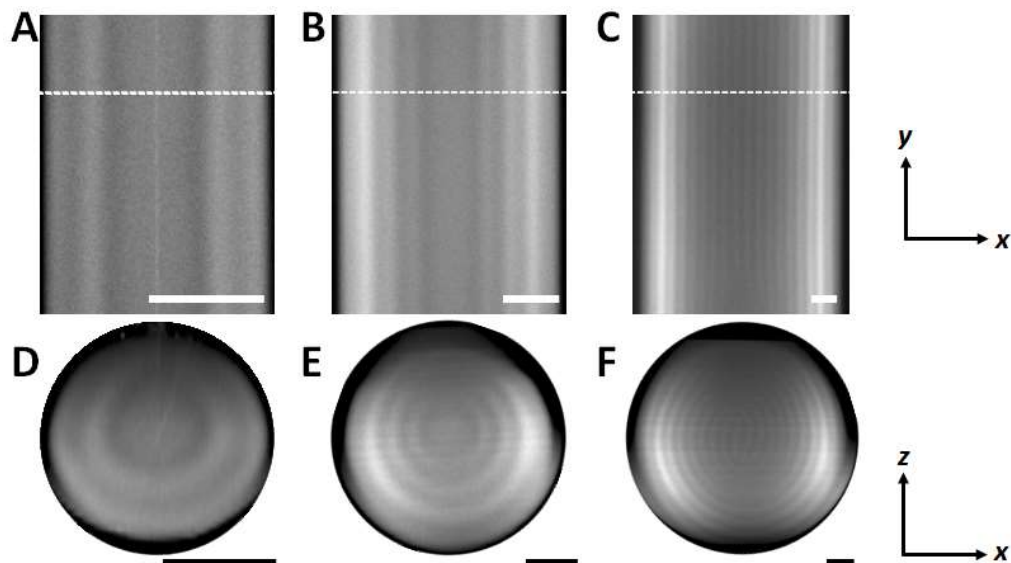

**Fig. S10.** Cross sections of CNC/rhodamine B suspensions in cylindrical capillaries. CLSM images of  $xy$  cross-sections (half-way through capillary in the  $z$  direction) for capillaries equilibrated for 72 h with inner diameters of (A) 50, (B) 100, and (C) 200  $\mu\text{m}$ , respectively. The dashed lines in A to C correspond to the  $xz$  cross-sectional images of the (D) 50, (E) 100, and (F) 200  $\mu\text{m}$  capillaries, respectively. Scale bars, 25  $\mu\text{m}$ .



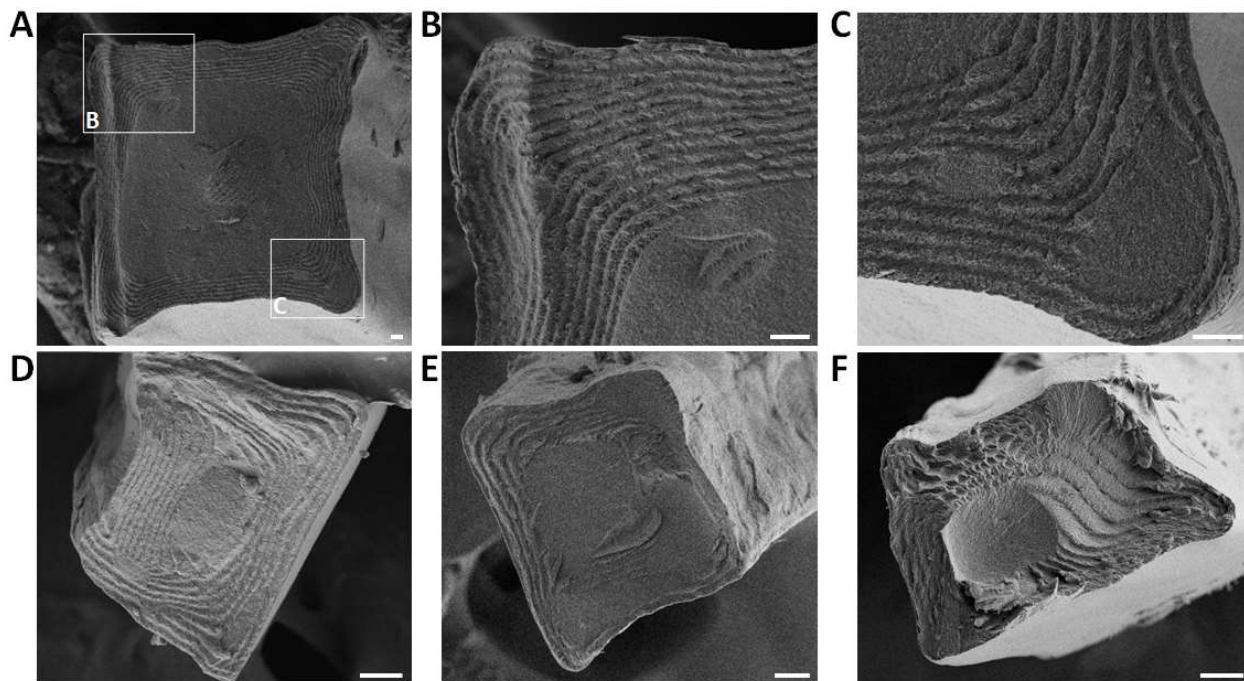

**Fig. S11.** SEM images of composite silica/CNC aerogel cross-sections. SEM images of cross-sections formed from square capillaries with an inner diameter of (A to C) 400  $\mu\text{m}$  and (D to F) 200  $\mu\text{m}$ . (B and C) correspond to the corners shown in (A), while (D to F) are different silica/CNC cross-sections from a 200  $\mu\text{m}$  capillary. Scale bars, 10  $\mu\text{m}$ .

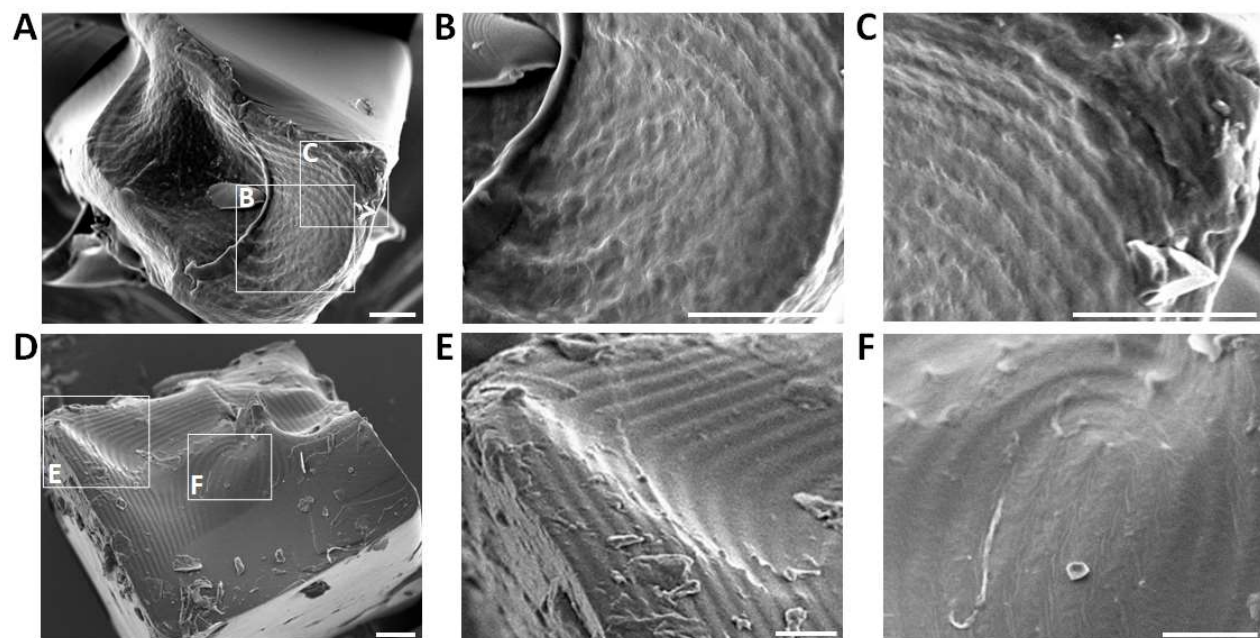

**Fig. S12.** SEM images of composite CNC/pHEA/pHEMA cross-sections. The samples were formed in square capillaries with an inner diameter of (A) 100  $\mu\text{m}$ . (B and C) correspond to the insets shown in (A). (D) is the cross-section from a capillary that had a 200  $\mu\text{m}$  cross-section, and (E and F) correspond to the insets of (D). Scale bars, 25  $\mu\text{m}$ .
